# Supplementary material for: Comparison of electro-oxidation coupled with UV irradiation (UV/EO) versus conventional oxidation processes (UV irradiation, chlorination, electro-oxidation, and UV/chlorine) for atenolol removal: role of operating parameters, energy performance, and toxicity
Source: Royal Society of Chemistry journal article supplement (doi:10.1039/d5ra05011a), 2025-01-01
Supplement: d5ra05011a1.pdf [file d5ra05011a1.pdf]

Comparative evaluation of electro-oxidation coupled with UV irradiation (UV/EO) and conventional oxidation processes (UV irradiation, chlorination, electro-oxidation, UV/Chlorine) for atenolol removal: Role of operating parameters, energy performance, and toxicity

Pannika Duangkaew<sup>1</sup>, Songkeart Phattarapattamawong<sup>1</sup>

<sup>1</sup> Department of Environmental Engineering, King Mongkut's University of Technology Thonburi

## **Supplementary information**

**Supplementary text-1** •OH and •Cl calculation

**Supplementary text-2** Calculation of kinetic degradation rate of ATL by Cl•

**Supplementary figure-1** ATL structure

**Supplementary figure-2** Experimental setup (a) Chlorination, (b) UV irradiation and UV/chlorine, (c) EO process, and (d) UV/EO process

**Supplementary figure-3** Kinetic degradation of ATL by chlorination, UV irradiation, EO, UV/Chlorine, and UV/EO

**Supplementary figure-4** Effect of UV lamp on kinetic degradation of ATL in UV/EO

**Supplementary figure-5** The CD profile of UV/EO

**Supplementary figure-6** Effect of CD on kinetic degradation of ATL in UV/EO

**Supplementary figure-7** Effect of NaCl on kinetic degradation of ATL in UV/EO

**Supplementary figure-8** Effect of phosphate buffer concentration on kinetic degradation of ATL in UV/EO

**Supplementary figure-9** Effect of ATL concentrations on kinetic degradation of ATL in UV/EO

**Supplementary figure-10** Effect of pH on kinetic degradation of ATL in UV/EO

## Supplementary text-1 •OH and •Cl calculation

### •OH concentration

$$\frac{d[pCBA]}{dt} = -k_{pCBA-\bullet OH}[\bullet OH][pCBA] \quad (1)$$

Comparing with the pseudo 1<sup>st</sup>-order equation for pCBA removal,

$$k'_{pCBA} = k_{pCBA-\bullet OH}[\bullet OH] \quad (2)$$

where  $k_{pCBA-\bullet OH}$  is the 2<sup>nd</sup>-order reaction rate constant for pCBA with •OH ( $5 \times 10^9 \text{ M}^{-1}\text{s}^{-1}$ ) (Rosenfeldt, Linden, Canonica, & von Gunten, 2006).  $k'_{pCBA}$  is the observed kinetic data of pCBA removal (pseudo 1<sup>st</sup>-order degradation rate constant). [•OH] and [pCBA] are concentrations of •OH and pCBA, respectively.

Substitute the  $k'_{pCBA}$  of  $0.0220 \text{ min}^{-1}$  or  $3.67 \times 10^{-4} \text{ s}^{-1}$  in the equation 2,

$$3.67 \times 10^{-4} \text{ s}^{-1} = 5.00 \times 10^9 \text{ M}^{-1}\text{s}^{-1} \times [\bullet OH]$$

$$\text{Thus, } [\bullet OH] = 7.34 \times 10^{-14} \text{ M}$$

### RCS concentration

$$\frac{d[BA]}{dt} = -(k_{BA-\bullet OH}[\bullet OH] + k_{BA-Cl\bullet}[Cl\bullet])[BA] \quad (3)$$

Comparing with the pseudo 1<sup>st</sup>-order equation for BA removal,

$$k'_{BA} = k_{BA-\bullet OH}[\bullet OH] + k_{BA-Cl\bullet}[Cl\bullet] \quad (4)$$

where  $k_{BA-\bullet OH}$ , and  $k_{BA-Cl\bullet}$  are 2<sup>nd</sup>-order reaction rate constants for BA with •OH ( $5.9 \times 10^9 \text{ M}^{-1}\text{s}^{-1}$ ) and BA with Cl• ( $1.8 \times 10^{10} \text{ M}^{-1}\text{s}^{-1}$ ), respectively (Wang, Wu, Huang, Wang, & Hu, 2016; Hoang, et al., 2022).  $k'_{BA}$  is the observed kinetic data of BA degradation (pseudo 1<sup>st</sup>-order degradation rate constant). [•OH] and [Cl•] are amount of •OH and Cl•, respectively.

Substitute the  $k'_{BA}$  of  $0.0286 \text{ min}^{-1}$  or  $4.77 \times 10^{-4} \text{ s}^{-1}$  in the equation 4,

$$4.77 \times 10^{-4} \text{ s}^{-1} = (5.90 \times 10^9 \text{ M}^{-1}\text{s}^{-1})(7.34 \times 10^{-14} \text{ M}) + 1.80 \times 10^{10} \text{ M}^{-1}\text{s}^{-1}[Cl\bullet]$$

$$\text{Thus, } [\text{Cl}\cdot] = 2.42 \times 10^{-15} \text{ M}$$

**Supplementary text-2** Calculation of kinetic degradation rate of ATL by  $\text{Cl}\cdot$  ( $k_{\text{ATL-Cl}\cdot}$ )

$$\frac{d[\text{ATL}]}{dt} = -(k_{\cdot\text{OH}}[\cdot\text{OH}] + k_{\text{Cl}\cdot}[\text{Cl}\cdot] + k_{\text{FAC}}[\text{FAC}] + k_{\text{UV}}[\Phi\epsilon\text{I}])[\text{ATL}] \quad (5)$$

Comparing with the pseudo 1<sup>st</sup>-order kinetic model of ATL removal,

$$k'_{\text{UV/EO-ATL}} = k_{\cdot\text{OH}}[\cdot\text{OH}] + k_{\text{Cl}\cdot}[\text{Cl}\cdot] + k_{\text{FAC}}[\text{FAC}] + k_{\text{UV}}[\Phi\epsilon\text{I}] \quad (6)$$

$$k'_{\text{FAC-ATL}} = k_{\text{FAC}}[\text{FAC}] \quad (7)$$

$$k'_{\text{UV-ATL}} = k_{\text{UV}}[\Phi\epsilon\text{I}] \quad (8)$$

where  $k'_{\text{UV/EO-ATL}}$ ,  $k'_{\text{FAC-ATL}}$ , and  $k'_{\text{UV-ATL}}$  are the observed kinetic data of ATL degradation by the UV/EO process, chlorination, and UV irradiation, respectively.  $k_{\cdot\text{OH}}$ ,  $k_{\text{Cl}\cdot}$ ,  $k_{\text{FAC}}$ , and  $k_{\text{UV}}$  are 2<sup>nd</sup>-order reaction rate constants of ATL to  $\cdot\text{OH}$ ,  $\text{Cl}\cdot$ , FAC, and UV light, respectively.  $[\cdot\text{OH}]$ ,  $[\text{Cl}\cdot]$ , and  $[\text{FAC}]$  are concentrations of  $\cdot\text{OH}$ ,  $\text{Cl}\cdot$ , and FAC, respectively.  $\Phi$ ,  $\epsilon$ , and  $\text{I}$  are quantum yield of ATL, molar absorption of ATL, and the UV fluence rate, respectively.

From the supplementary figure-1,  $k'_{\text{UV/EO-ATL}}$ ,  $k'_{\text{UV-ATL}}$ , and  $k'_{\text{FAC-ATL}}$  were  $0.0599 \text{ min}^{-1}$  ( $9.98 \times 10^{-4} \text{ s}^{-1}$ ),  $0.0025 \text{ min}^{-1}$  ( $4.17 \times 10^{-5} \text{ s}^{-1}$ ),  $0.0035 \text{ min}^{-1}$  ( $5.83 \times 10^{-5} \text{ s}^{-1}$ ), respectively.  $k_{\cdot\text{OH-ATL}}$  was  $7.10 \times 10^9 \text{ M}^{-1}\text{s}^{-1}$  (Wols, Harmsen, Beerendonk, & Hofman-Caris, 2014). Substitute all values in the equation 6;

$$\begin{aligned} 9.98 \times 10^{-4} \text{ s}^{-1} &= (7.10 \times 10^9 \text{ M}^{-1}\text{s}^{-1})(7.34 \times 10^{-14} \text{ M}) + k_{\text{Cl}\cdot}(2.42 \times 10^{-15} \text{ M}) \\ &\quad + (5.83 \times 10^{-5} \text{ s}^{-1}) + (4.17 \times 10^{-5} \text{ s}^{-1}) \\ k_{\text{Cl}\cdot\text{-ATL}} &= 1.55 \times 10^{11} \text{ M}^{-1}\text{s}^{-1} \end{aligned}$$

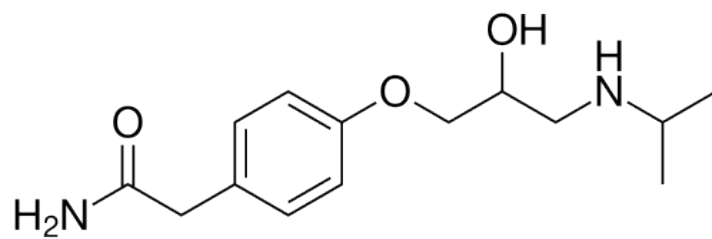

**Supplementary figure-1** ATL structure

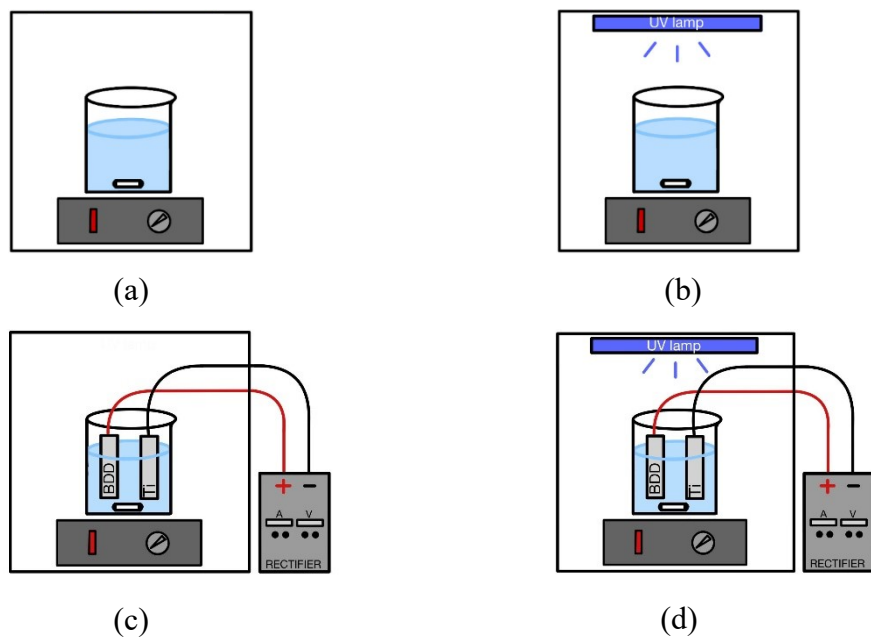

**Supplementary figure-2** Experimental setup (a) Chlorination, (b) UV irradiation and UV/chlorine, (c) EO process, and (d) UV/EO process

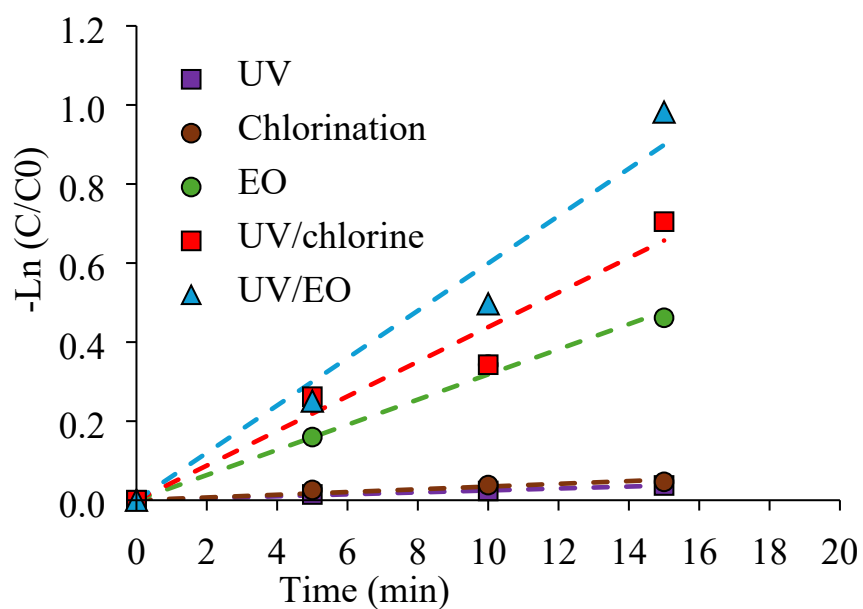

(a)

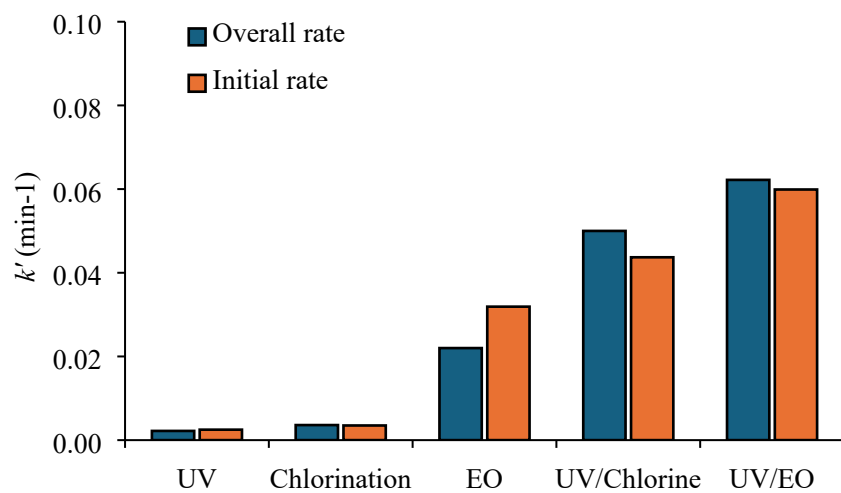

(b)

**Supplementary figure-3** Kinetic ATL degradation by the initial rate method (a) and overall rate (b) for chlorination, UV irradiation, EO, UV/Chlorine, and UV/EO

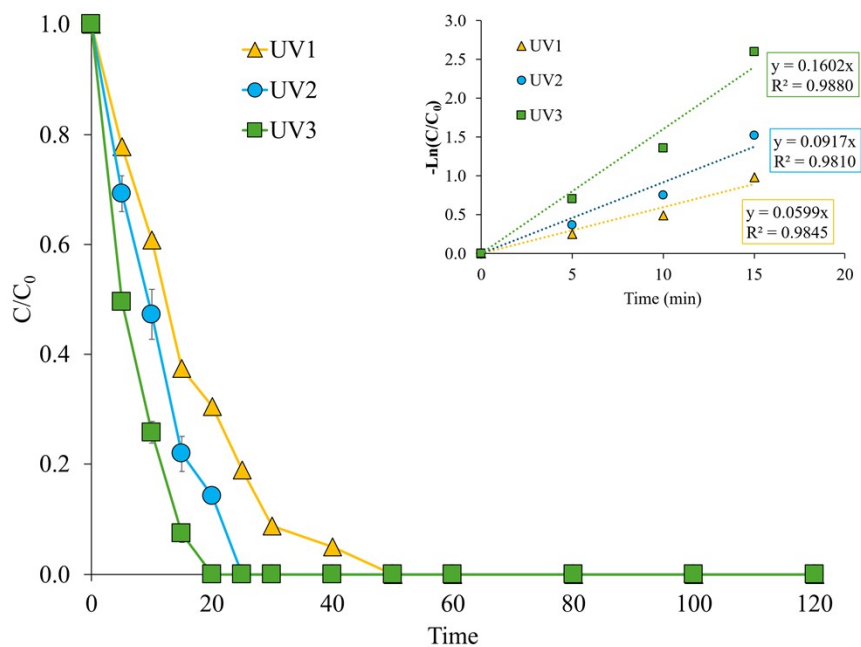

**Supplementary figure-4** Effect of UV lamp on kinetic degradation of ATL in UV/EO

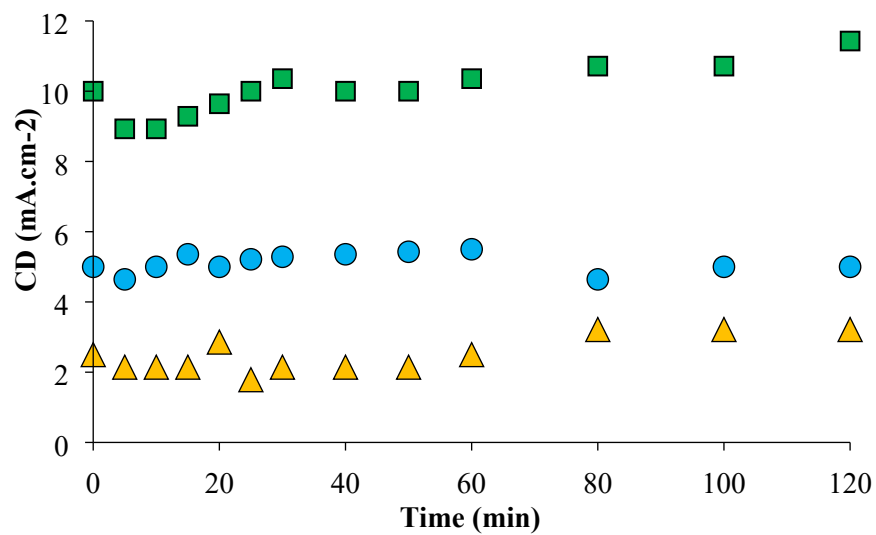

**Supplementary figure-5** The CD profile of UV/EO

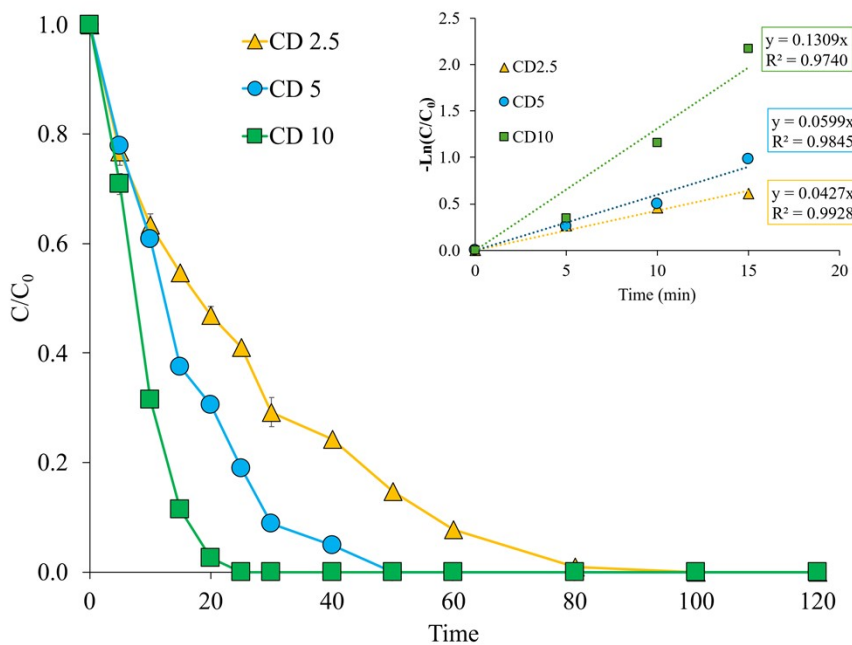

**Supplementary figure-6** Effect of CD on kinetic degradation of ATL in UV/EO

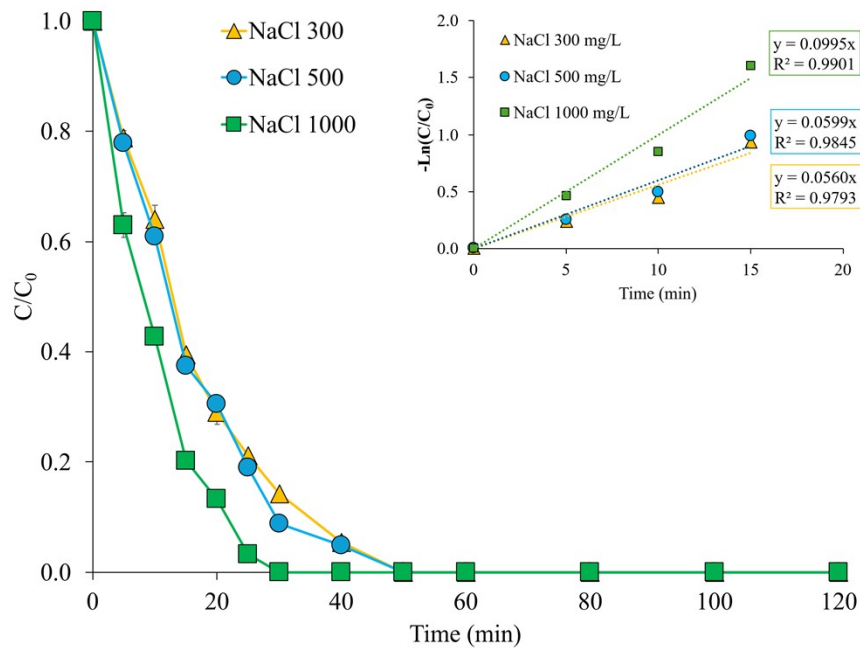

**Supplementary figure-7** Effect of NaCl on kinetic degradation of ATL in UV/EO



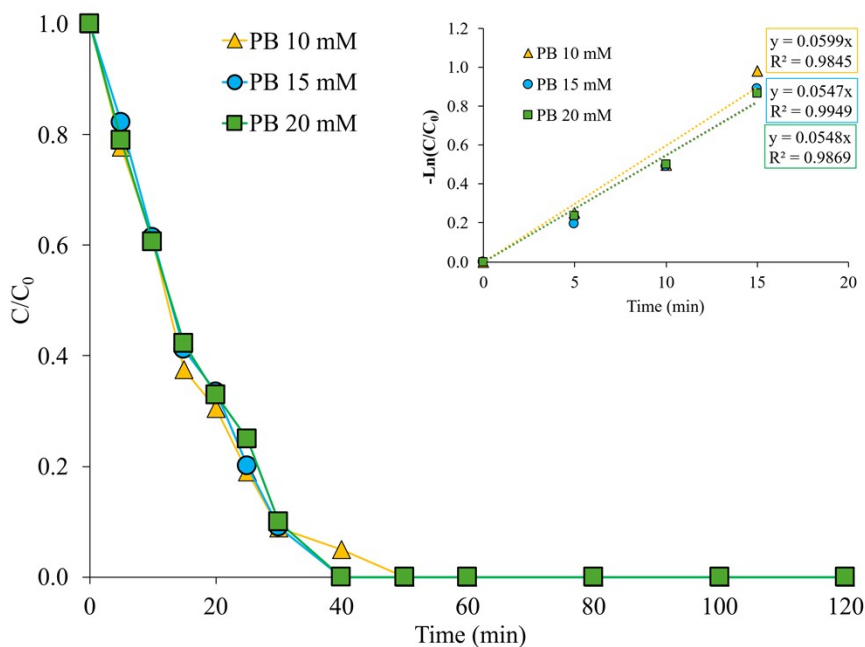

**Supplementary figure-8** Effect of phosphate buffer concentration on kinetic degradation of ATL in UV/EO

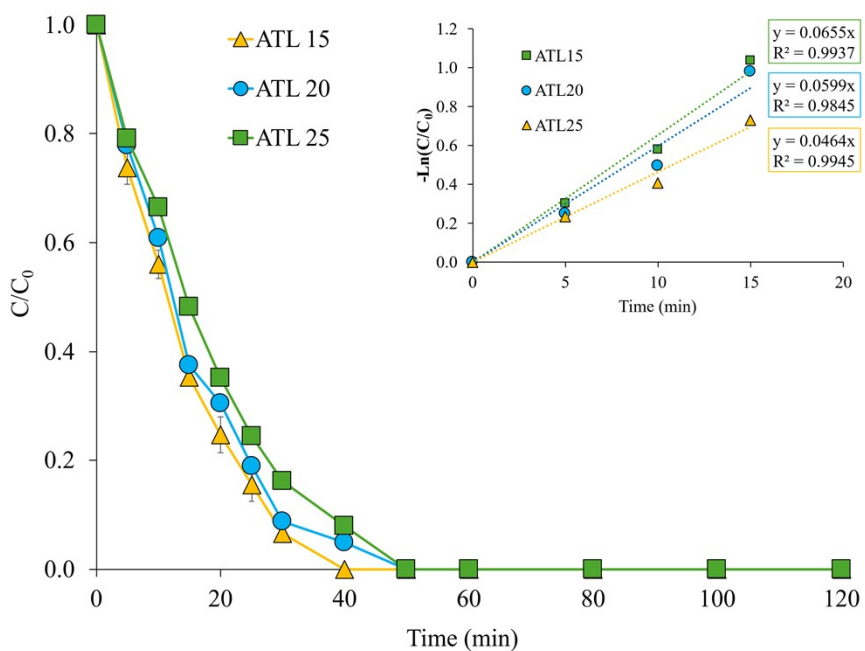

**Supplementary figure-9** Effect of ATL concentrations on kinetic degradation of ATL in UV/EO

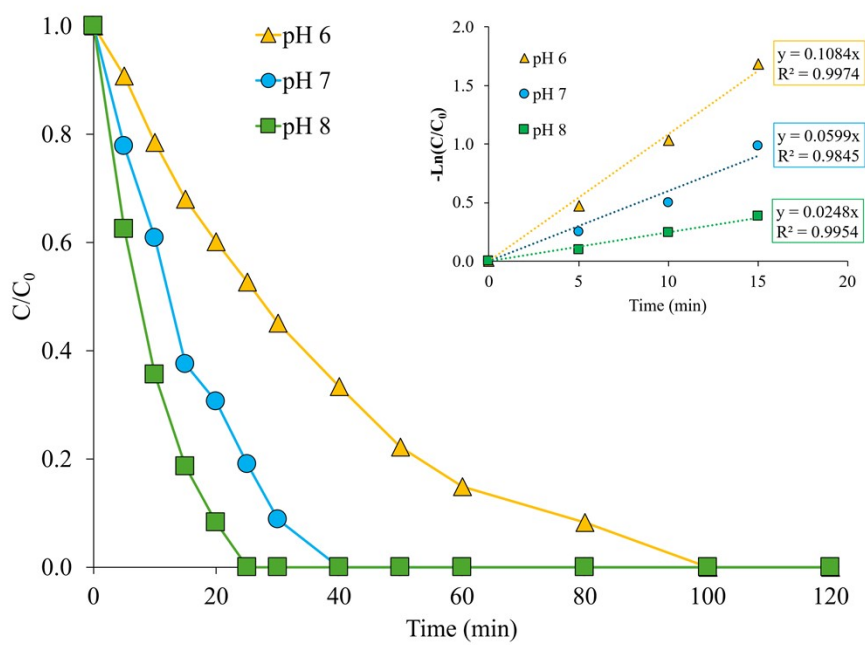

**Supplementary figure-10** Effect of pH on kinetic degradation of ATL in UV/EO
